# Supplementary material
Source: PubMed Central journal article supplement (PMC4264608)
Supplement: NIHMS570011-supplement-supplement_1.pdf [file NIHMS570011-supplement-supplement_1.pdf]

30. Liberzon, A.; Subramanian, A.; Pinchback, R.; Thorvaldsdóttir, H.; Tamayo, P.; Mesirov, J.P. Molecular signatures database (MSigDB) 3.0. *Bioinformatics* **2011**, *27*, 1739–1740.
31. Zhao, T.; Xu, Y. p53 and stem cells: New developments and new concerns. *Trends Cell Biol.* **2010**, *20*, 170–175.

Appendix

**Figure S1.** Performance of R-EBSeq Against Other Methods as a Function of the Number of Replicates. In all panels, the thick black line is Cuffdiff, the solid red is R-EBSeq, the large dashed black line is DESeq and the small dashed black line is Bayseq. The number of replicates for each plot is indicated by the value for  $n$  above the graph. In each panel, the bottom row (top 100) is zoomed-in version of the top row (top 1,000). (A) Performance in the case of noise-free data; (B) Performance in the case of overdispersed, noise augmented data.

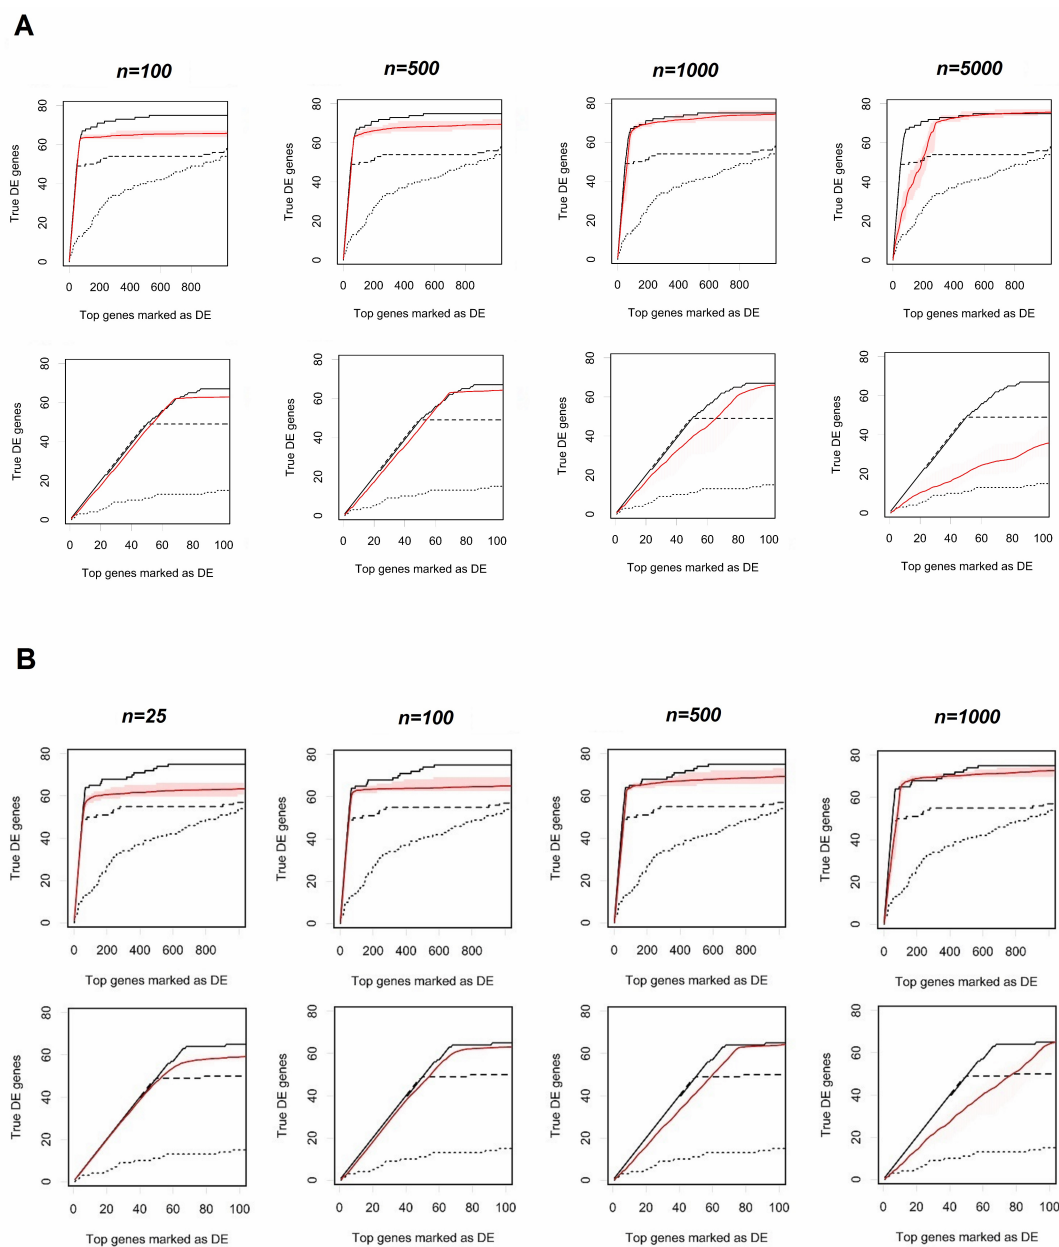

For the description of the EBarrays LNNMV code, see *nolog.R* file.

© 2013 by the authors; licensee MDPI, Basel, Switzerland. This article is an open access article distributed under the terms and conditions of the Creative Commons Attribution license (<http://creativecommons.org/licenses/by/3.0/>).
